# Supplementary material for: Fast-track pathway for elective caesarean section: a quality improvement initiative to promote day 1 discharge
Source: PubMed Central journal article supplement — BMJ Open Qual. 2019 Jun 12;8(2):e000465. doi: 10.1136/bmjoq-2018-000465 (PMC6567941; doi:10.1136/bmjoq-2018-000465), 2019-06-12
Supplement: bmjoq-2018-000465supp001.pdf [file bmjoq-2018-000465supp001.pdf]

## Supplement 1

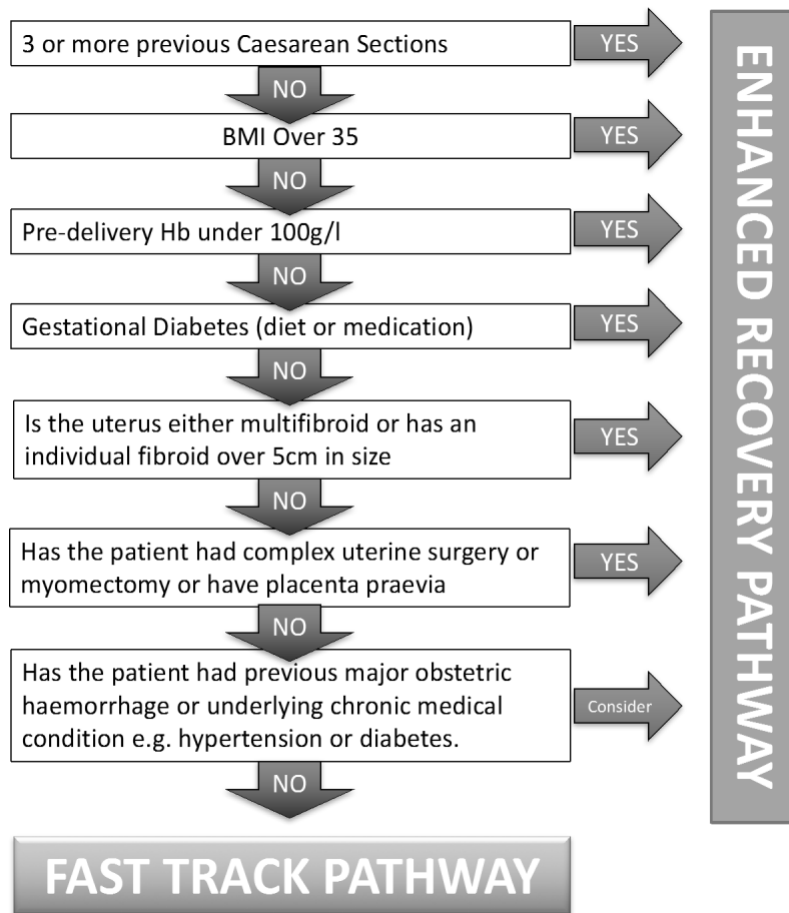

Patient selection criteria for fast-track pathway or enhanced recovery pathway. Pathway describes the criteria that are used by medical staff at antenatal appointments in order to determine whether a women booking for a category 4 caesarean section should be invited to fast-track pathway. Standard of care is the enhanced recovery pathway (unless there is a major complex exclusion criteria which should be considered on a case-by-case basis).
