# Supplementary material for: Fast-track pathway for elective caesarean section: a quality improvement initiative to promote day 1 discharge
Source: PubMed Central journal article supplement — BMJ Open Qual. 2019 Jun 12;8(2):e000465. doi: 10.1136/bmjoq-2018-000465 (PMC6567941; doi:10.1136/bmjoq-2018-000465), 2019-06-12
Supplement: bmjoq-2018-000465supp002.pdf [file bmjoq-2018-000465supp002.pdf]

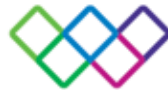

**ELCS FAST TRACK PATHWAY TRACKER**

**PRE-OP:**

**Date/Time.....**

Sticker on Notes via MDAU? Y / N

Identified on Last Word? Y / N

**THEATRE:**

**SIMPSON UNIT:**

Time INTO Theatre: .....

Time ONTO Simpson Unit: .....

Time of Spinal: .....

Time Cannula Out: .....

Time Surgery Started: .....

Time Catheter Out: .....

Time Surgery Ended: .....

Time OUT of Simpson Unit: .....

**AT 6 HOURS POST OP:**

DSUM/TTO DONE? Y / N ***[IF NOT PLEASE CONTACT SURGICAL TEAM OR ONCALL SHO]***

FBC Done at 6 hours? Y / N

**DAY 1:**

Time of R/V in Fast-Track Bed: .....

Time Discharged/Transferred to Discharge Lounge: .....

Women's Physiotherapy review? Y / N

Please Document Any Reason for Delays Below.....

.....

***Patient Satisfaction: PRIOR TO DISCHARGE PLEASE ASK THE BELOW 5 QUESTIONS***

*(1=very unsatisfied – 5=very satisfied)*

Overall, how satisfied have you been with your admission? 1 2 3 4 5

How satisfied were you with the timing of catheter removal? 1 2 3 4 5

How satisfied were you with the timing of cannula removal? 1 2 3 4 5

How satisfied were you with the timing of mobilising? 1 2 3 4 5

*Any other comments?*

Name:  
Hospital no:

**Follow up Questionnaire for PN Fast Track women.**

1. Have you visited your GP since being discharged from the Maternity unit?

Yes/No

If yes, on how many occasions and why?

2. How well do you think you have managed with your pain since leaving the maternity unit using a scale of 1-10 (1 being *'not an issue'* and 10 being *'unmanageable'*)

1. 2. 3. 4. 5. 6. 7. 8. 9. 10.

3. Were you been followed up by your community midwife within 48 hours of discharge?

Yes/No

4. Have you experienced any unexpected problems since discharge?

Yes/No If Yes, what?

5. Were you breast feeding exclusively/ mixed/ bottle feeding in hospital? Please circle.

6. Were you breastfeeding exclusively/ mixed/ bottle feeding on day 7 after your c-section? Please circle

6. Have you any comments/ suggestions you would like to make regards your experience in Chelsea and Westminster Maternity Unit?
