# Supplementary material for: Fast-track pathway for elective caesarean section: a quality improvement initiative to promote day 1 discharge
Source: PubMed Central journal article supplement — BMJ Open Qual. 2019 Jun 12;8(2):e000465. doi: 10.1136/bmjoq-2018-000465 (PMC6567941; doi:10.1136/bmjoq-2018-000465), 2019-06-12
Supplement: bmjoq-2018-000465supp003.pdf [file bmjoq-2018-000465supp003.pdf]

**Supplement 3.** Patient reported experience of early mobilisation on Day 1 and pain control on Day 7 telephone survey following successful fast-track.

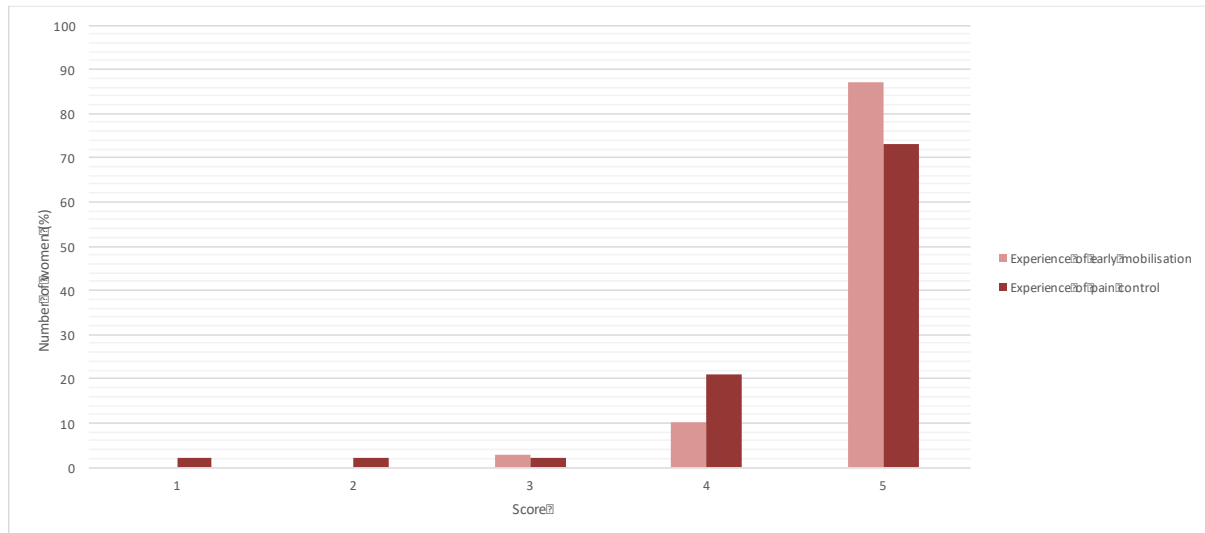

Women who remained on the fast-track pathway were surveyed on Day 1 prior to discharge to determine their experience of early mobilisation (n=63) on a scale of 1 to 5 where 1 is not satisfied and 5 is very satisfied (light red). Women were also surveyed at 7 days and asked to report their overall experience of pain control since caesarean section (n=52) (dark red). Women reported pain control as a score of 1 to 10 where 1 was poor and 10 was excellent. The data was then transformed to a 5-point scale for purposes of graphical comparison by dividing the score by two and rounding to the nearest 1 significant figure.
